# Supplementary material for: Spermatozoa Survival in Egg Yolk-Based and Soybean-Based Extenders at Ambient and Chilling Temperature in Domestic Turkeys (Meleagris gallopavo)
Source: MDPI journal article supplement (doi:10.3390/ani12050648), 2022-03-03
Supplement: s1 [file s1]

**Table S1.** Spermiogram of turkey toms enrolled in the study.

| Parameters                           | Turkey 1<br>N =9 | Turkey 2<br>N =16 | Turkey 3<br>N =15 | Turkey 4<br>N =11 | Turkey 5<br>N =11 | Turkey 6<br>N =15 | Turkey 7<br>N =7 | Mean<br>N =84                   |
|--------------------------------------|------------------|-------------------|-------------------|-------------------|-------------------|-------------------|------------------|---------------------------------|
| Volume (ml)                          | 0.17 ± 0.14      | 0.19 ± 0.62       | 0.19 ± 0.11       | 0.21 ± 0.11       | 0.22 ± 0.14       | 0.35 ± 0.13       | 0.21 ± 0.11      | 0.23 ± 0.13<br>(0.20 - 0.25)    |
| Concentration (x10 <sup>9</sup> /ml) | 4.18 ± 2.32      | 4.72 ± 2.42       | 5.30 ± 2.28       | 5.46 ± 4.04       | 4.48 ± 1.84       | 6.43 ± 2.74       | 5.07 ± 2.60      | 5.16 ± 2.66<br>(4.59-5.74)      |
| Motility (%)                         | 88.78 ± 5.33     | 91.50 ± 5.30      | 86.53 ± 6.00      | 88.91 ± 9.00      | 83.72 ± 7.54      | 85.87 ± 6.31      | 84.29 ± 9.76     | 87.22 ± 7.42<br>(85.63 - 88.81) |
| Viability (%)                        | 95.22 ± 3.90     | 97.06 ± 4.78      | 97.53 ± 2.19      | 96.00 ± 4.15      | 95.73 ± 4.88      | 96.27 ± 5.27      | 97.29 ± 2.23     | 96.44 ± 4.11<br>(95.56 - 97.32) |
| Morphological defects (%)            | 4.67 ± 3.04      | 3.44 ± 2.63       | 5.80 ± 3.55       | 4.27 ± 2.90       | 6.46 ± 3.62       | 4.67 ± 3.31       | 7.14 ± 3.63      | 5.54 ± 3.53<br>(4.38 - 5.90)    |
| pH                                   | 7.29 ± 0.34      | 7.10 ± 0.34       | 7.85 ± 0.55       | 7.73 ± 0.34       | 7.38 ± 0.48       | 7.60 ± 0.39       | 7.57 ± 0.53      | 7.50 ± 0.49<br>(7.40 - 7.60)    |

\*Values in parenthesis represent the 95% confidence interval for each parameter. N= number of replications.

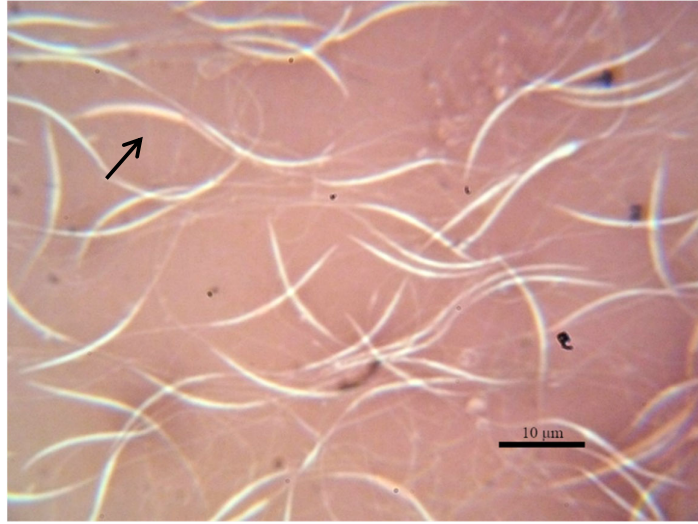

**Figure S1.** Photomicrograph of fresh undiluted turkey semen stained with eosin-nigrosin showing live (unstained) and dead sperm (partially stained, arrow).
